# Supplementary material
Source: PubMed Central journal article supplement (PMC3591670)
Supplement: supp_O112.024059_mcp.O112.024059-1.pdf [file supp_O112.024059_mcp.O112.024059-1.pdf]

**SUPPLEMENTARY MATERIAL FOR:**

**A high-throughput assay for phosphoprotein-specific phosphatase activity  
in cellular extracts**

Anjun K. Bose‡ and Kevin A. Janes‡§

‡Department of Biomedical Engineering, University of Virginia, Charlottesville, VA 22908

§To whom correspondence should be addressed: Department of Biomedical Engineering, Box 800759 Health System, Charlottesville, VA 22908. Email: [kjanes@virginia.edu](mailto:kjanes@virginia.edu)

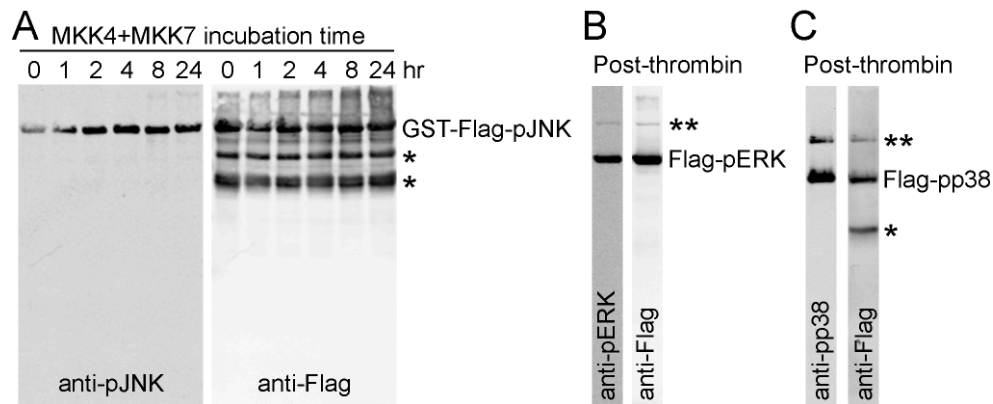

**SUPPLEMENTAL FIG. 1. In vitro phosphorylation and thrombin digestion of MAPKs does not give rise phosphorylated cleavage products.** *A*, extended phosphorylation of GST-Flag-JNK leads to saturated phosphorylation but no change in JNK cleavage products. Agarose beads carrying recombinant GST-Flag-JNK were incubated with constitutively active MKK4 and MKK7 for the indicated times and analyzed by immunoblotting for pJNK (left) or Flag (right). Single asterisks indicate Flag-containing JNK cleavage products, which are not phosphorylated by MKK4 and MKK7. *B* and *C*, thrombin digestion of GST-Flag-pMAPKs releases Flag-pMAPKs without creating pMAPK cleavage products. Agarose beads carrying *B*, GST-Flag-pERK or *C*, GST-Flag-pp38 were incubated with thrombin, and supernatants were analyzed by immunoblotting for *B*, pERK (left) and Flag (right) or *C*, pp38 (left) and Flag (right). Single asterisk indicates Flag-containing p38 cleavage product that is not phosphorylated, and double asterisks indicate small amounts of GST-Flag-pMAPK that was released but not cleaved during the thrombin digestion. In *A–C*, note that cleavage products are not detectably phosphorylated and thus should not interfere with the ELISA measurements.

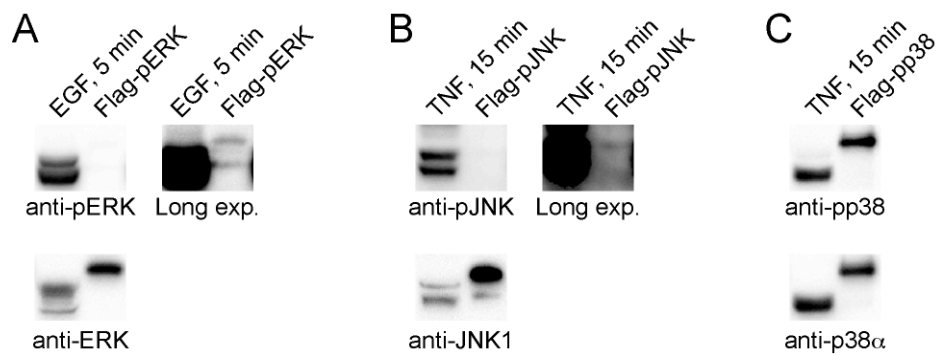

**SUPPLEMENTAL FIG. 2. Recombinant pMAPKs are phosphorylated at or below the stoichiometry observed in vivo for endogenous MAPKs.** A, Flag-pERK was compared with endogenous pERK from HT-29 cells stimulated with 100 ng/ml EGF for 5 min by immunoblotting for pERK (upper; right shows a longer exposure to visualize Flag-pERK) with total ERK (lower) used as a loading control. B, Flag-pJNK was compared with endogenous pJNK from HT-29 cells stimulated with 100 ng/ml TNF for 15 min by immunoblotting for pJNK (upper; right shows a longer exposure to visualize Flag-pJNK) with total JNK1 (lower) used as a loading control. C, Flag-pp38 was compared with endogenous pp38 from HT-29 cells stimulated with 100 ng/ml TNF for 15 min by immunoblotting for pp38 (upper) with total p38 $\alpha$  used as a loading control.

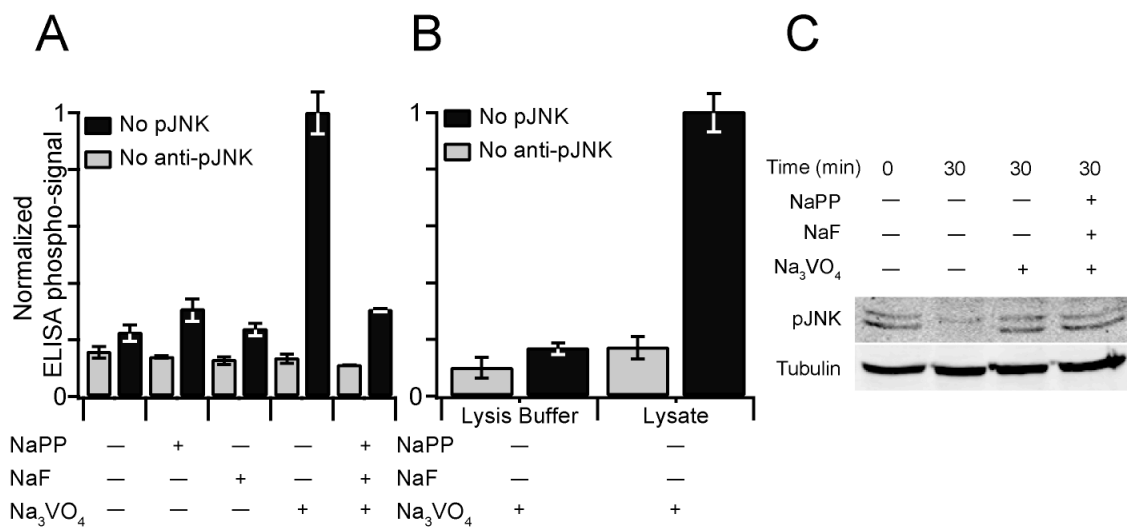

**SUPPLEMENTAL FIG. 3. Na<sub>3</sub>VO<sub>4</sub>-treatment of cell lysates creates a false-positive pJNK signal in the ELISA format.** *A*, the Na<sub>3</sub>VO<sub>4</sub>-induced signal requires anti-pJNK primary antibody. The pJNK PPase assay was performed with inhibitor-treated lysates in the presence and absence of immobilized pJNK or the anti-pJNK primary antibody. Note the large increase in ELISA signal in the absence of immobilized pJNK. *B*, the Na<sub>3</sub>VO<sub>4</sub>-induced signal requires PPase lysates. The PPase assay was performed with Na<sub>3</sub>VO<sub>4</sub>-treated lysate or lysis buffer in the presence or absence of immobilized pJNK or the anti-pJNK primary antibody. *C*, Na<sub>3</sub>VO<sub>4</sub> does not cause increased phosphorylation of endogenous JNK. PPase lysates were incubated for the indicated times at 30°C and blotted for pJNK with tubulin as a loading control. Data are shown as the mean ± S.E.M. of three independent assay replicates.

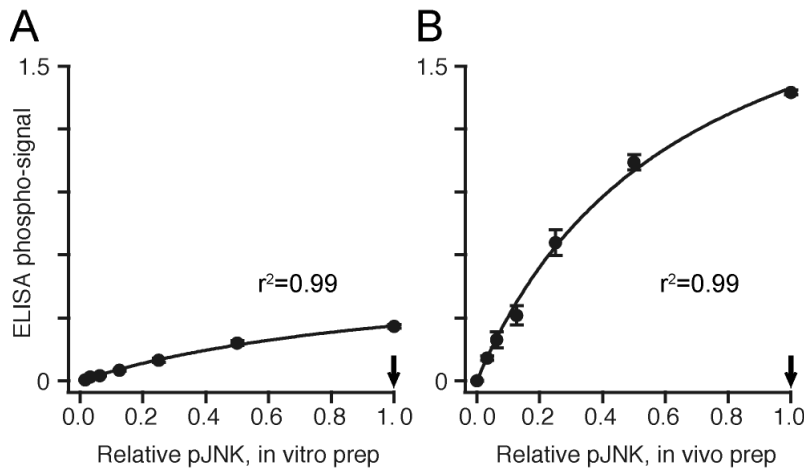

**SUPPLEMENTAL FIG. 4. JNK phosphoprotein yield is substantially improved by in vivo phosphorylation with MKK4–MKK7 before bacterial protein purification.** *A*, two-fold dilution series (relative level 1.0 = ~400 ng) of pJNK prepared by in vitro phosphorylation of purified GST-JNK with purified constitutively active MKK4 and MKK7. Data are replotted from Fig. 2*B* with a change of scale on the y-axis for comparison. *B*, two-fold dilution series (relative level 1.0 = ~500 ng) of pJNK prepared in vivo by co-induction of GST-JNK, MKK4, and MKK7 in bacteria. MKK4–MKK7 were introduced as a bicistronic plasmid with a different origin of replication and selection marker for coexpression with the GST-JNK plasmid. Note the ~fourfold higher pJNK ELISA signal compared to (*A*). Data are shown as the mean  $\pm$  S.E.M. of 3–4 independent assay replicates.
